# Supplementary material for: Imaging and multi-omics datasets converge to define different neural progenitor origins for ATRT-SHH subgroups
Source: PubMed Central journal article supplement (PMC10589300; doi:10.1038/s41467-023-42371-7), 2023-10-20
Supplement: 41467_2023_42371_MOESM2_ESM.pdf [file 41467_2023_42371_MOESM2_ESM.pdf]

## Description of Additional Supplementary Files

### SUPPLEMENTARY DATA LEGEND

#### **Supplementary Data 1: Patient and sample information**

Information corresponding to each of the 61 human ATRT samples: (1) minimal clinical features of the patients from whom the sample was collected ; (2) anatomical location for samples with available MRI ; (3) age at diagnosis ; (4) RNA-seq subgrouping for samples with available RNA-seq data, NA (Not Available) otherwise ; (5) DNA methylation subgroup for samples with available DNA methylation array, NA otherwise ; (6) DKFZ brain tumor ATRT subgrouping for samples with available DNA methylation array, NA otherwise ; (7) DKFZ brain tumor classifier score for samples with available DNA methylation array data ; (8) gene expression profile at the single cell level.

#### **Supplementary Data 2: sPLS-DA gene contribution in the 3 first principal components**

List of the genes that are contributing in the 3 first principal components of the Sparse Partial Least Squares Discriminant Analysis (sPLS-DA); the respective scores of contribution in each component. sPLS-DA were conducted using the *mixOmics* framework (version 6.14.1) Bioconductor R package. The optimal number of components as well as the number of genes per component were determined by running the *perf()* and *tune.splsda()* functions using 3-fold cross-validation repeated 50 times. Finally, sPLS-DA analysis was run using the *splsda()* function using 3 components with respectively the 90, 100 and 50 previously selected genes (supplementary Fig. 2B).

#### **Supplementary Data 3: Mouse sample information**

Information corresponding to each of the 62 mouse samples : (1) mouse features ; (2) Tamoxifen treatment date ; (3) age in days ; (4) sex, F: female, M: male, NA: not available ; (5) tumor location, IC: intracranial, EC: extracranial ; (6) tumor sub-location, CNS: Central Nervous System ; (7) RNAseq/Affy, gene expression profile analysed using RNA-seq or Affymetrix microarray ; (8) subgroup ; (9) scRNAseq, gene expression profile analysed at the single cell level.

#### **Supplementary Data 4: List of differentially expressed genes for each anatomical-molecular subgroup in a « one versus all others » manner**

List of the 100 most differentially expressed genes (based on fold-change of genes with a corrected *p*-value less than 0.05) between anatomical-molecular subgroups in a "one versus all others" manner ( $n_{\text{CNCNS-MYC}} = 13$ ,  $n_{\text{BG/IV-SHH}} = 8$ ,  $n_{\text{CAL-SHH}} = 12$ ,  $n_{\text{MCP/ICV-TYR}} = 6$ ). Differential gene expression analyses were performed using *DESeq()* function of the *DESeq2* Bioconductor R package (version 1.30.1). Size factor estimation, dispersion estimation, binomial negative GLM fitting and Wald test were applied on

filtered raw counts. Resulting  $p$ -values were corrected using the Benjamini and Hochberg method (a.k.a. FDR).

#### **Supplementary Data 5: Differential gene expression analysis between BG/IV SHH and MYC**

Result of the differential gene expression analyses between BG/IV SHH ( $n = 8$ ) and MYC ( $n = 13$ ) ATRT subtypes. Differential gene expression analyses were performed using *DESeq()* function of the *DESeq2* Bioconductor R package (version 1.30.1). Size factor estimation, dispersion estimation, binomial negative GLM fitting and Wald test were applied on filtered raw counts. Resulting  $p$ -values were corrected using the Benjamini and Hochberg method (a.k.a. FDR).

#### **Supplementary Data 6: Differential gene expression analysis between BG/IV SHH and CAL SHH**

Result of the differential gene expression analyses between BG/IV SHH ( $n = 8$ ) and CAL SHH ( $n = 12$ ) ATRT subtypes. Differential gene expression analyses were performed using *DESeq()* function of the *DESeq2* Bioconductor R package (version 1.30.1). Size factor estimation, dispersion estimation, binomial negative GLM fitting and Wald test were applied on filtered raw counts. Resulting  $p$ -values were corrected using the Benjamini and Hochberg method (a.k.a. FDR).

#### **Supplementary Data 7: Gene markers of the 13 mouse R26 single cell clusters**

List of gene markers of each of the 13 cell clusters identified in the single cell data of integrated mouse R26-Shh samples ( $n = 3$ ). Cluster gene markers were identified by differential expression analyses in « one versus others » manner using the *FindAllMarkers()* function of the Seurat R package (version 3.2.2). The default Wilcoxon Rank Sum test was applied. Genes with a  $\log_2(\text{fold-change})$  higher than 0.5, an adjusted  $p$ -value lower than 0.01 and detected in more than 25 % of the cells of the given cluster were considered as gene markers for this cluster.

#### **Supplementary Data 8: Differential gene expression analysis between CAL SHH and MB SHH**

Result of the differential gene expression analyses between CAL SHH ATRT subtype ( $n = 12$ ) and SHH medulloblastoma subtype ( $n = 7$ ). Differential gene expression analyses were performed using *DESeq()* function of the *DESeq2* Bioconductor R package (version 1.30.1). Size factor estimation, dispersion estimation, binomial negative GLM fitting and Wald test were applied on filtered raw counts. Resulting  $p$ -values were corrected using the Benjamini and Hochberg method (a.k.a. FDR).

#### **Supplementary Data 9: Gene markers of the 10 human ATRT CAL SHH single cell clusters**

List of gene markers of each of the 10 cell clusters identified in the single cell data of integrated ATRT CAL SHH samples ( $n = 4$ ). Cluster gene markers were identified by differential expression analyses in « one versus others » manner using the *FindAllMarkers()* function of the Seurat R package (version

3.2.2). The default Wilcoxon Rank Sum test was applied. Genes with a  $\log_2(\text{fold-change})$  higher than 0.5, an adjusted  $p$ -value lower than 0.01 and detected in more than 25 % of the cells of the given cluster were considered as gene markers for this cluster.

**Supplementary Data 10: Differential gene expression analysis between DAPT and DMSO treated CHLA-02 cell line**

Result of the differential gene expression analyses between DAPT (n=3) and DMSO (n=3) treated CHLA-02 cell lines. The analysis was performed using *DESeq()* function of the *DESeq2* Bioconductor R package (version 1.30.1). Size factor estimation, dispersion estimation, binomial negative GLM fitting and Wald test were applied on filtered raw counts. Resulting p-values were corrected using the Benjamini and Hochberg method (a.k.a. FDR).

**Supplementary Data 11: Differential gene expression analysis between DAPT and DMSO treated IC-032 cell line**

Result of the differential gene expression analyses between DAPT (n=3) and DMSO (n=3) treated IC-032 cell line. The analysis was performed using *DESeq()* function of the *DESeq2* Bioconductor R package (version 1.30.1). Size factor estimation, dispersion estimation, binomial negative GLM fitting and Wald test were applied on filtered raw counts. Resulting p-values were corrected using the Benjamini and Hochberg method (a.k.a. FDR).
